# Supplementary material for: Chemical composition-dependent hygroscopic behavior of individual ambient aerosol particles collected at a coastal site
Source: Copernicus journal article supplement (doi:10.5194/acp-23-12571-2023), 2023-10-09

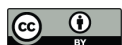

*Supplement of*

## **Chemical composition-dependent hygroscopic behavior of individual ambient aerosol particles collected at a coastal site**

**Li Wu et al.**

*Correspondence to:* Chul-Un Ro ([curo@inha.ac.kr](mailto:curo@inha.ac.kr))

The copyright of individual parts of the supplement might differ from the article licence.

**Table S1.** Elemental concentrations (in at.%) of 37 ambient particles determined by low-Z particle EPMA (SSAs #15 and #27 are not included here due to the recombination of the particle after hygroscopic process).

| Particle group               | Mole fractions                        | No.  | Size ( $\mu\text{m}$ ) | C    | N    | O    | Na   | Mg  | Al  | Si   | S    | Cl   | K   | Ca   | Cr | Mn  | Fe   |
|------------------------------|---------------------------------------|------|------------------------|------|------|------|------|-----|-----|------|------|------|-----|------|----|-----|------|
|                              | $X_{(\text{Na}, \text{Mg})\text{Cl}}$ |      |                        |      |      |      |      |     |     |      |      |      |     |      |    |     |      |
| SSAs<br>Cl-rich              | 0.75                                  | 5    | 4.93                   | 29.7 | 4.3  | 17.5 | 22.1 | 2.8 |     |      | 1.4  | 20.9 | 0.6 | 0.7  |    |     |      |
|                              | 0.76                                  | 3    | 3.81                   | 36.4 | 4.4  | 19.0 | 19.5 | 1.6 |     |      | 0.9  | 17.3 | 0.5 | 0.4  |    |     |      |
|                              | 0.76                                  | 24   | 4.97                   | 24.7 | 7.3  | 18.6 | 24.0 | 2.0 |     |      | 1.1  | 21.2 | 0.5 | 0.6  |    |     |      |
|                              | 0.71                                  | 19   | 4.43                   | 35.5 | 5.9  | 17.0 | 20.3 | 2.2 |     |      | 0.9  | 17.6 | 0.4 | 0.3  |    |     |      |
|                              | 0.68                                  | 21   | 4.26                   | 38.3 | 6.5  | 19.4 | 17.6 | 1.9 |     |      | 1.0  | 14.5 | 0.4 | 0.4  |    |     |      |
|                              | 0.65                                  | 13   | 4.76                   | 34.6 | 8.3  | 18.3 | 19.5 | 2.0 |     |      | 1.1  | 15.2 | 0.4 | 0.5  |    |     |      |
|                              | 0.61                                  | 9    | 3.73                   | 46.1 | 6.1  | 21.4 | 13.3 | 1.6 |     |      | 0.7  | 10.1 | 0.3 | 0.3  |    |     |      |
|                              | 0.55                                  | 26   | 3.80                   | 49.3 | 4.6  | 23.3 | 11.9 | 1.4 |     |      | 0.9  | 8.1  | 0.2 | 0.3  |    |     |      |
|                              | 0.52                                  | 23   | 4.56                   | 47.4 | 6.0  | 23.0 | 12.3 | 1.6 |     |      | 0.9  | 8.0  | 0.4 | 0.3  |    |     |      |
| 0.41                         | 35                                    | 3.84 | 48.0                   | 8.2  | 25.7 | 10.4 | 1.3  |     |     | 0.7  | 5.3  | 0.2  | 0.2 |      |    |     |      |
| SSAs<br>Cl-depleted          | 0.34                                  | 1    | 4.64                   | 44.8 | 11.0 | 24.9 | 11.6 | 1.5 |     |      | 0.8  | 4.9  | 0.2 | 0.2  |    |     |      |
|                              | 0.29                                  | 31   | 3.36                   | 49.3 | 7.5  | 25.0 | 11.2 | 1.5 |     |      | 1.0  | 4.1  | 0.2 | 0.3  |    |     |      |
|                              | 0.28                                  | 33   | 5.27                   | 46.3 | 8.0  | 27.9 | 11.3 | 1.4 |     |      | 0.7  | 4.0  | 0.2 | 0.2  |    |     |      |
|                              | 0.29                                  | 22   | 4.82                   | 50.0 | 8.1  | 26.2 | 9.8  | 1.2 |     |      | 0.5  | 3.5  | 0.3 | 0.3  |    |     |      |
|                              | 0.27                                  | 39   | 4.88                   | 45.7 | 10.2 | 28.1 | 10.1 | 1.2 |     |      | 0.7  | 3.4  | 0.3 | 0.3  |    |     |      |
|                              | 0.25                                  | 30   | 4.33                   | 47.8 | 8.4  | 30.0 | 8.9  | 1.1 |     |      | 0.6  | 2.8  | 0.2 | 0.2  |    |     |      |
|                              | 0.25                                  | 10   | 3.65                   | 50.2 | 8.6  | 27.0 | 9.4  | 1.0 |     |      | 0.5  | 2.8  | 0.2 | 0.3  |    |     |      |
|                              | 0.23                                  | 11   | 2.94                   | 50.6 | 8.3  | 26.3 | 9.8  | 1.2 |     |      | 0.5  | 2.8  | 0.3 | 0.3  |    |     |      |
|                              | 0.22                                  | 12   | 2.70                   | 43.6 | 6.7  | 33.8 | 10.6 | 1.2 |     |      | 0.9  | 2.9  | 0.2 |      |    |     |      |
|                              | 0.15                                  | 16   | 3.79                   | 38.4 | 12.8 | 32.7 | 11.1 | 1.2 |     |      | 1.0  | 2.1  | 0.3 | 0.2  |    |     |      |
|                              | 0.15                                  | 6    | 4.12                   | 43.4 | 9.8  | 29.6 | 11.9 | 1.6 |     |      | 0.8  | 2.3  | 0.2 | 0.3  |    |     |      |
|                              | 0.15                                  | 18   | 3.17                   | 46.9 | 12.5 | 26.0 | 12.6 |     |     |      | 0.1  | 1.9  |     |      |    |     |      |
| overall average              |                                       |      |                        | 43.0 | 7.9  | 24.6 | 13.6 | 1.5 |     |      | 0.8  | 8.0  | 0.3 | 0.3  |    |     |      |
| standard deviation           |                                       |      |                        | 7.2  | 2.3  | 4.9  | 4.6  | 0.4 |     |      | 0.3  | 6.6  | 0.1 | 0.1  |    |     |      |
| Ca-containing                |                                       | 17   | 3.01                   | 23.2 | 8.0  | 50.7 |      | 2.6 | 1.7 | 5.1  |      | 0.6  | 0.3 | 7.8  |    |     |      |
|                              |                                       | 20   | 3.87                   | 20.7 | 7.4  | 49.7 |      | 0.4 | 0.2 | 0.2  |      | 0.7  |     | 20.6 |    |     |      |
|                              |                                       | 25   | 5.84                   | 33.5 | 4.3  | 48.5 |      | 4.8 | 0.2 | 0.3  | 0.1  | 0.2  |     | 8.2  |    |     |      |
|                              |                                       | 34   | 2.47                   | 19.8 | 5.6  | 56.4 |      | 0.4 | 2.1 | 4.0  |      | 0.1  |     | 10.8 |    |     | 0.9  |
|                              |                                       | 38   | 3.64                   | 20.9 | 8.7  | 50.4 |      | 0.5 | 0.4 | 0.3  | 3.7  | 1.1  |     | 14.0 |    |     |      |
| Alumino-<br>silicates        | aged                                  | 4    | 1.87                   | 23.4 |      | 49.5 |      | 1.1 | 7.4 | 12.6 | 0.2  | 0.2  | 1.1 | 0.6  |    | 1.6 | 2.2  |
|                              | aged                                  | 8    | 3.35                   | 22.8 | 7.0  | 48.7 |      | 1.1 | 4.1 | 8.5  |      | 0.3  | 0.5 | 5.5  |    |     | 1.4  |
|                              | aged                                  | 14   | 2.98                   | 13.4 | 3.6  | 48.6 | 4.8  | 5.0 | 5.0 | 12.0 | 0.7  | 0.7  | 1.0 | 3.4  |    |     | 1.9  |
|                              | aged                                  | 28   | 2.89                   | 14.1 | 3.8  | 50.0 | 0.9  | 5.2 | 6.1 | 12.8 | 0.4  | 0.2  | 1.8 | 3.2  |    |     | 1.4  |
|                              |                                       | 29   | 2.35                   | 1.5  |      | 57.7 | 6.2  |     | 8.7 | 25.9 |      |      |     |      |    |     |      |
|                              | 32                                    | 2.38 | 17.6                   |      |      | 44.0 |      | 1.4 | 9.4 | 19.5 |      |      | 1.1 | 0.6  |    | 2.8 | 3.7  |
| SiO <sub>2</sub>             | aged                                  | 37   | 2.05                   | 9.2  | 2.9  | 59.5 |      | 0.8 | 3.1 | 22.4 |      |      | 0.8 | 0.9  |    |     | 0.5  |
| Organic and ammonium sulfate |                                       | 36   | 2.21                   | 75.1 | 4.1  | 10.2 |      |     |     |      | 10.7 |      |     |      |    |     |      |
| Fe-rich                      |                                       | 2    | 1.93                   | 24.7 |      | 39.7 |      |     |     | 0.5  |      | 1.1  |     | 3.0  |    |     | 31.0 |
|                              |                                       | 7    | 2.50                   | 22.1 | 0.0  | 18.7 |      |     | 0.6 | 11.6 |      |      |     | 7.2  |    |     | 39.9 |

**Figure S1.** Optical images of the second field (particles #17 - #26) during humidifying (A-F,  $\uparrow$ ) and dehydration (G-K,  $\downarrow$ ) processes and the SEI of the same field (L).

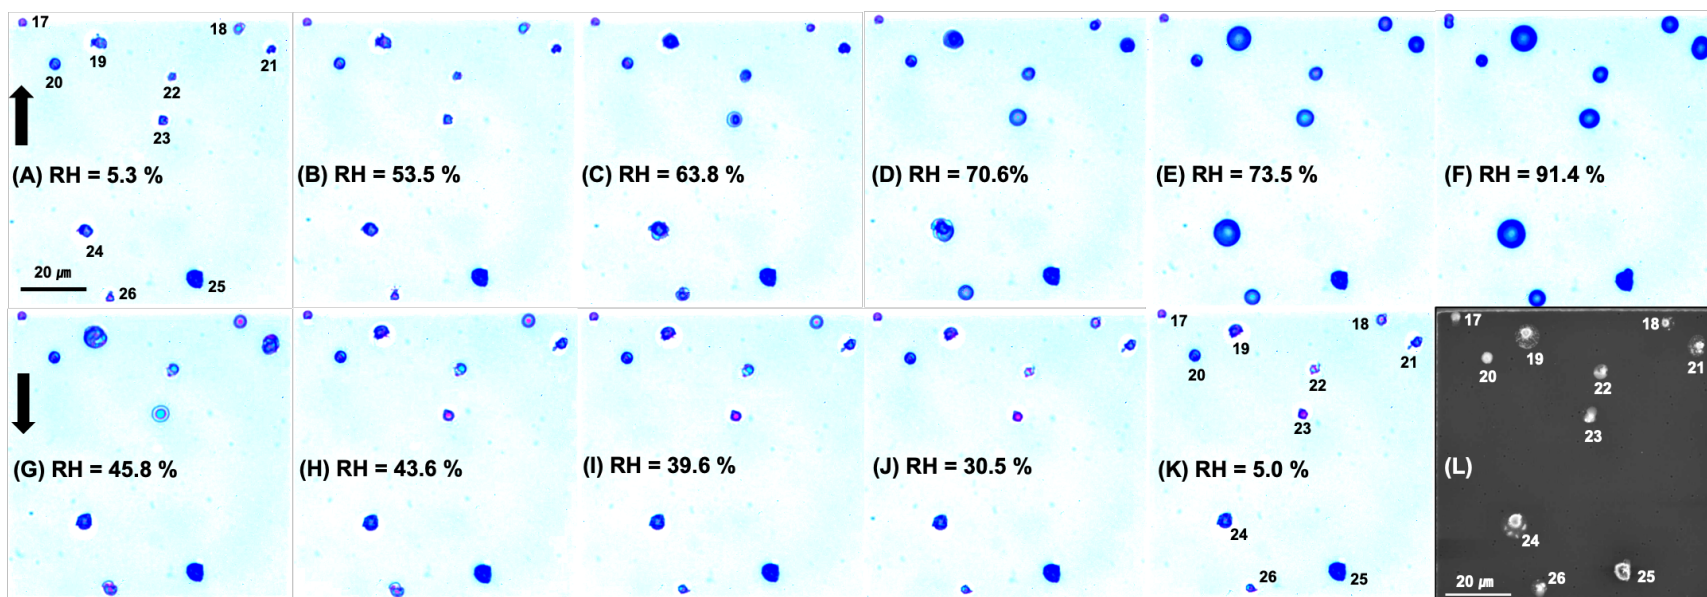

**Figure S2.** Optical images of the third field (particles #27 - #39) during humidifying (A-F,  $\uparrow$ ) and dehydration (G-K,  $\downarrow$ ) processes and the SEI of the same field (L).

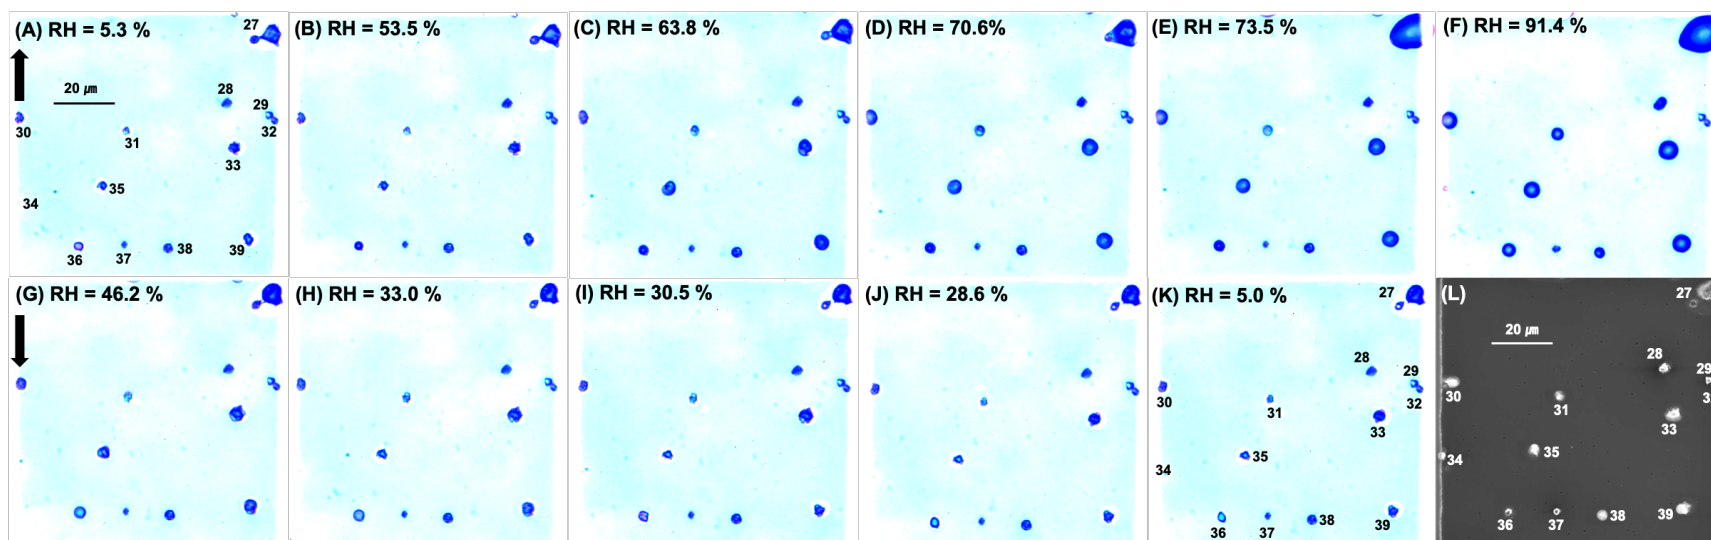

**Figure S3.** 2-D area ratio plots of (Na, Mg)(Cl, NO<sub>3</sub>) aerosols as a function of RH and secondary electron images (SEIs) of the effloresced ones.

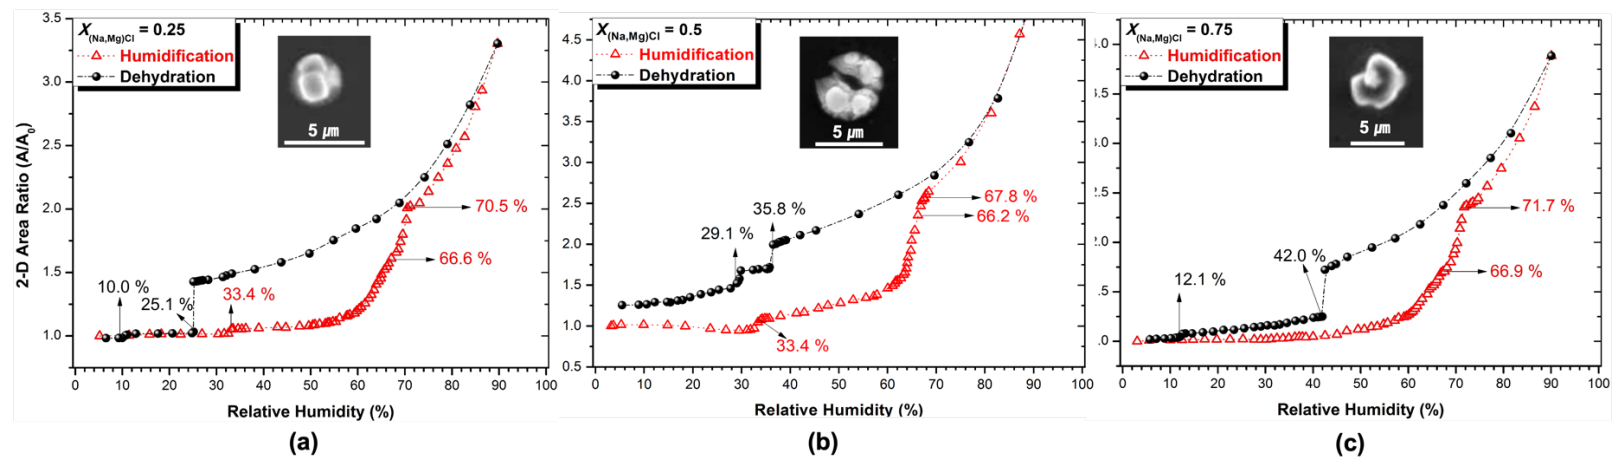

**Figure S4.** X-Ray elemental maps for C, N, O, Na, Mg, S, Cl, and Ca and secondary electron images (SEIs) of the effloresced ambient SSAs: (a) SSA #5 and (b) SSA #19 with Cl-rich compositions of  $X_{(\text{Na,Mg})\text{Cl}} = 0.75$  and  $0.72$ , respectively.

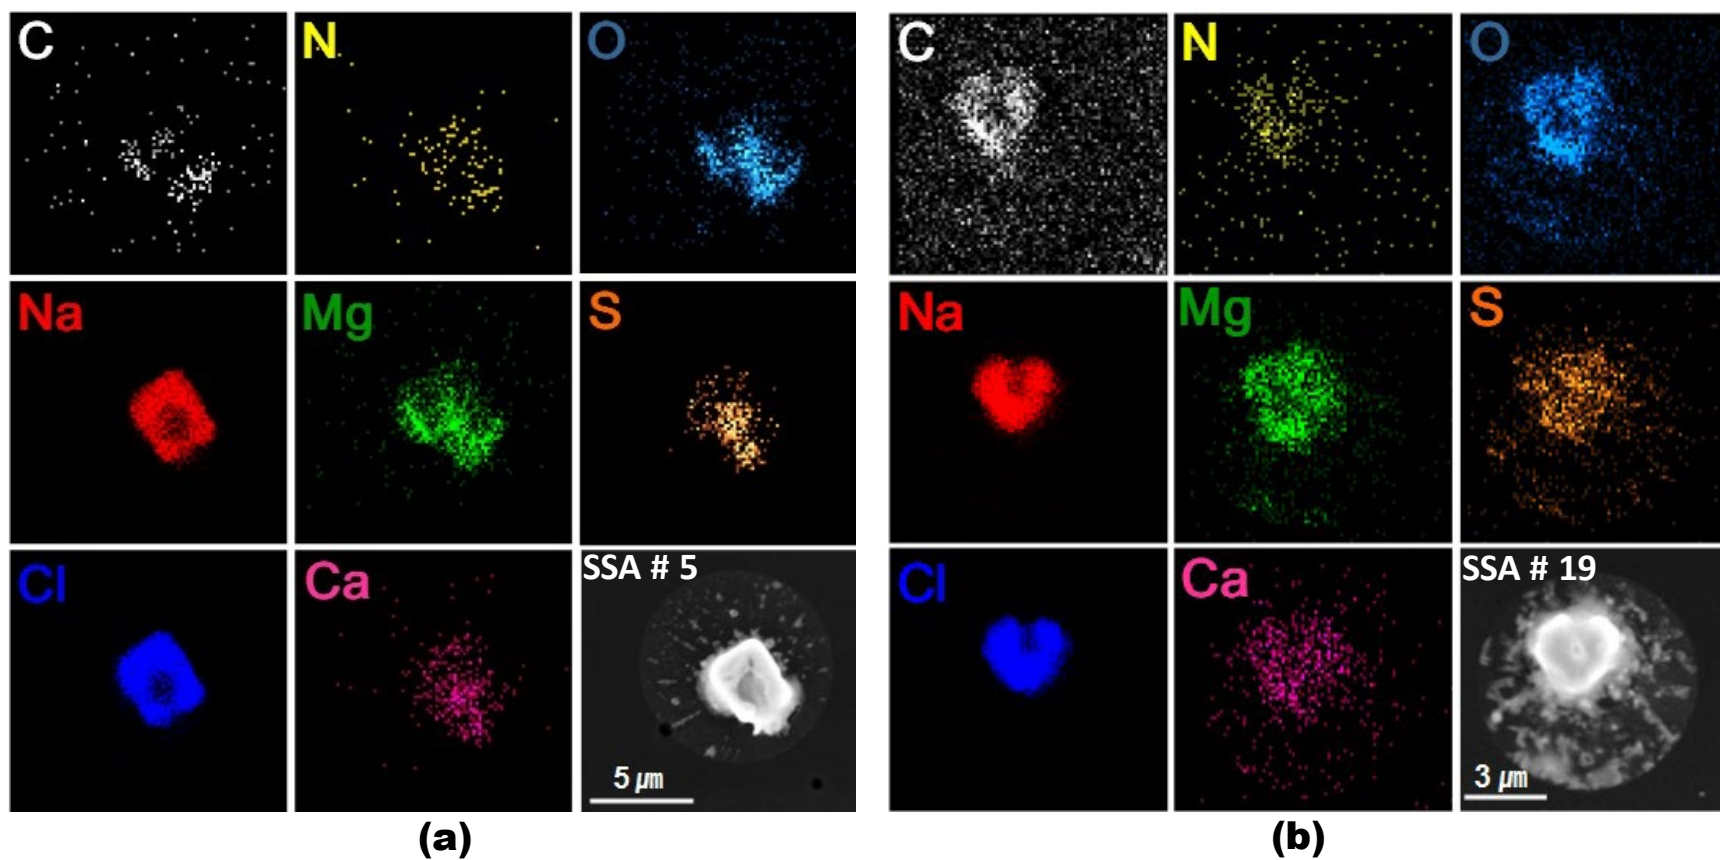

**Figure S5.** X-Ray elemental maps for C, N, O, Na, Mg, S, Cl, and Ca and secondary electron images (SEIs) of the effloresced ambient SSAs: (a) SSA #23 and (b) SSA #11 with equimolar and Cl-depleted compositions of  $X_{(\text{Na,Mg})\text{Cl}} = 0.52$  and 0.23, respectively.

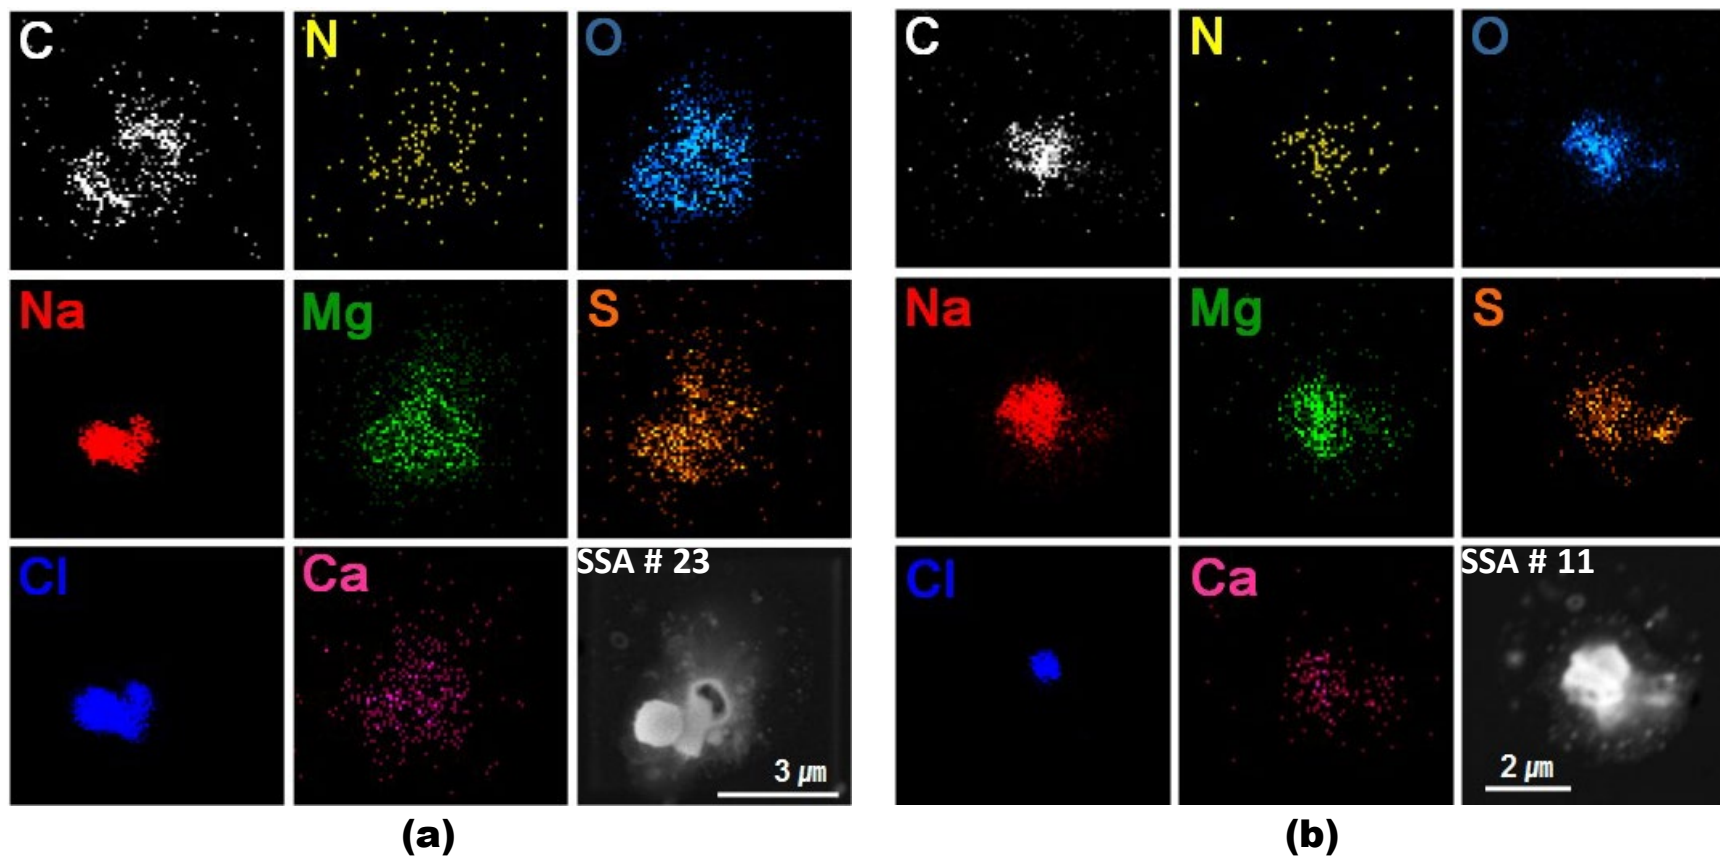

**Figure S6.** 2-D area ratio plot, X-ray spectrum, and SEM image with diameter of a reacted Ca-containing particle (particle #20).

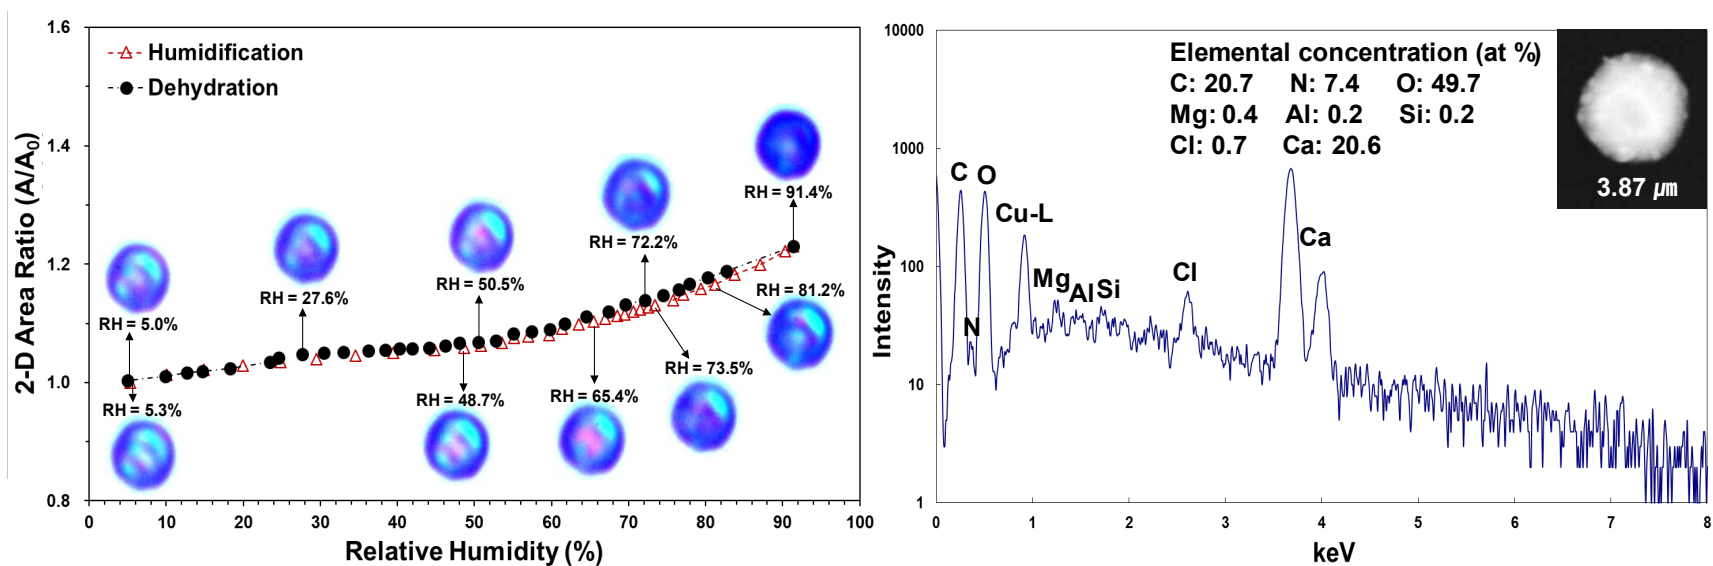



**Figure S7.** 2-D area ratio plot, X-ray spectrum, and SEM image with diameter of an ammonium sulfate aerosol mixed with organics (particle #36).

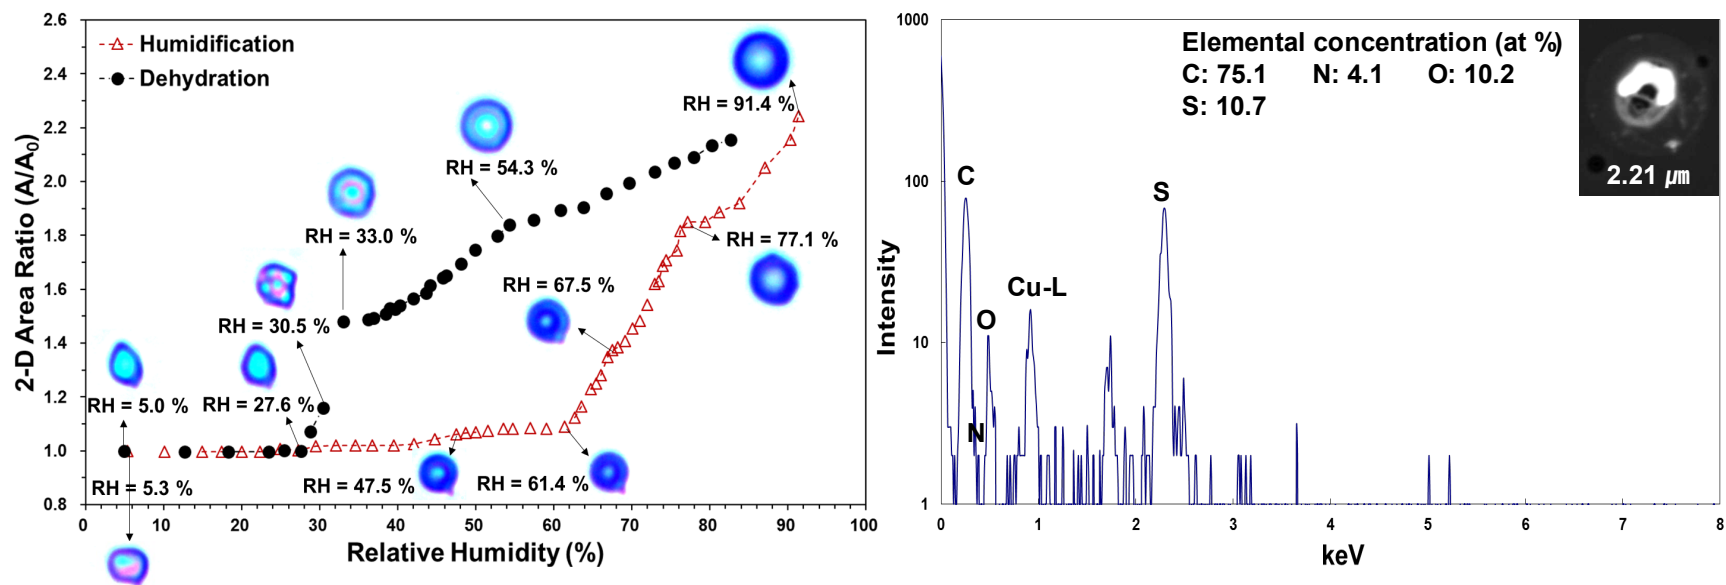

**Figure S8.** 2-D area ratio plots, X-ray spectra, and SEM images with diameters of partially reacted Ca-containing particles (particles #17 and #25).

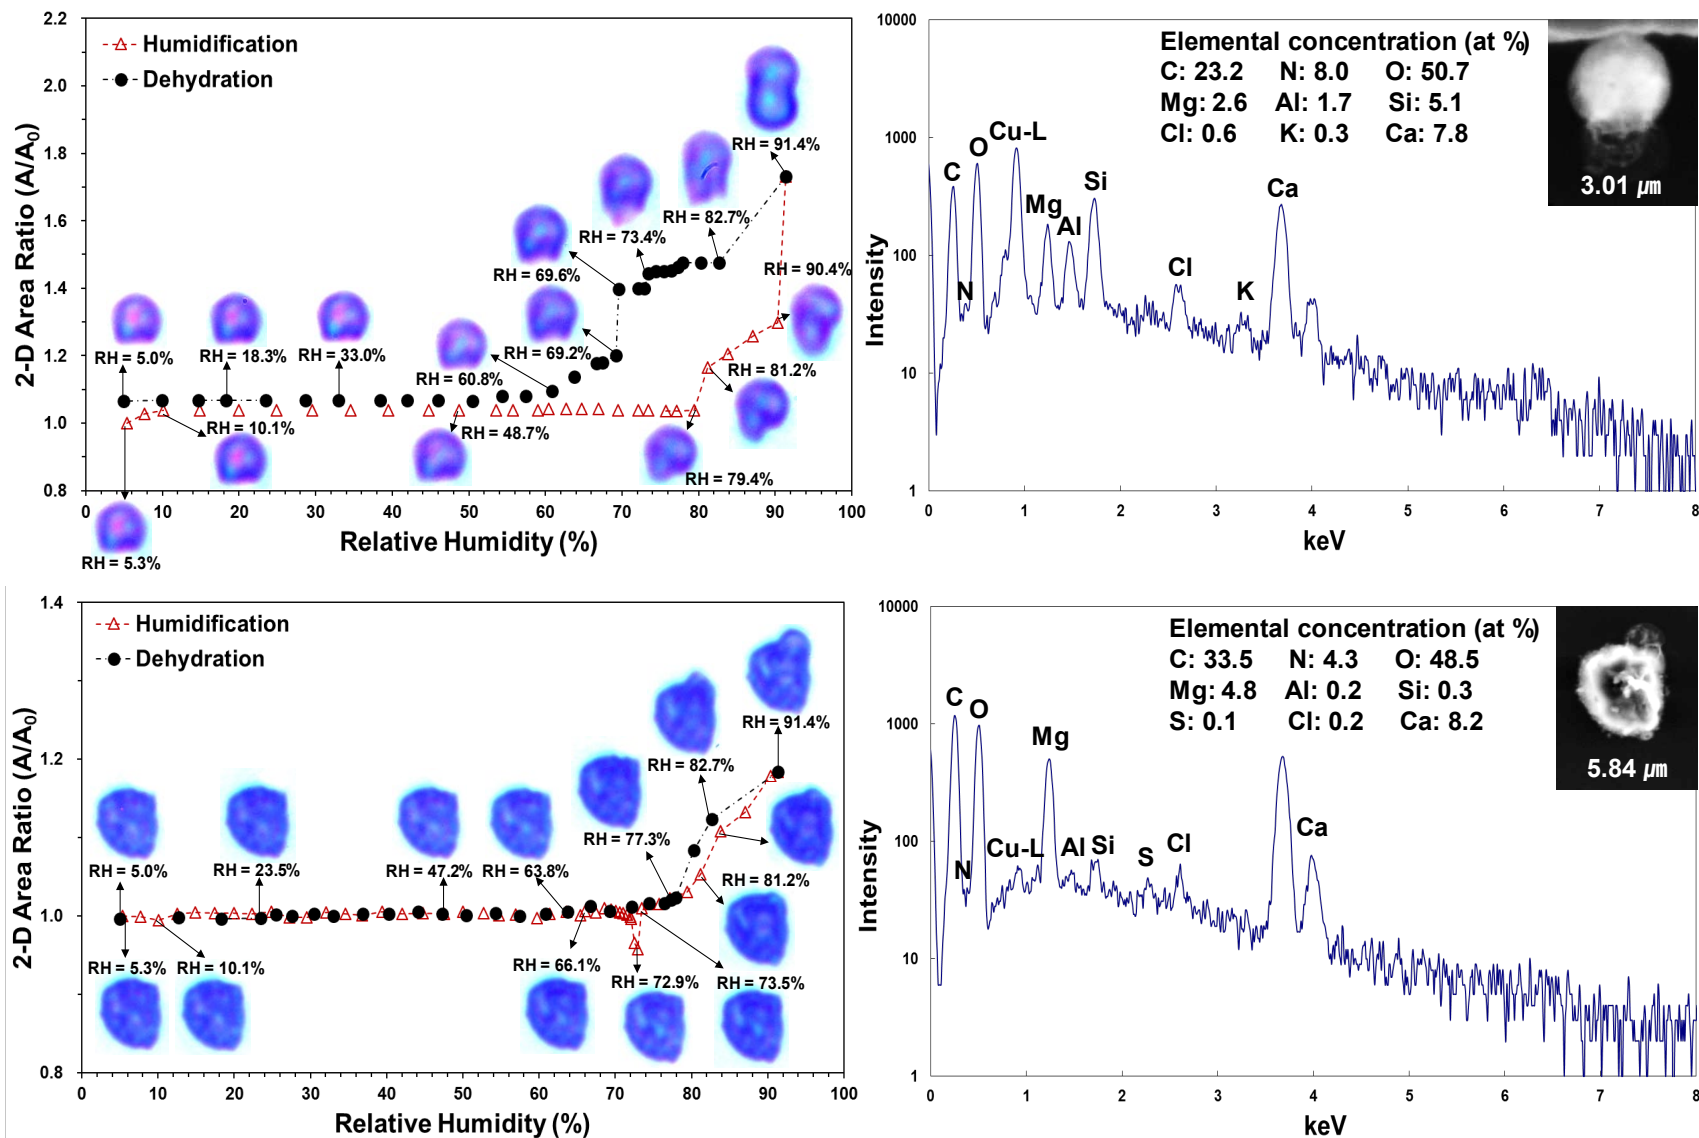

**Figure S9.** 2-D area ratio plot, X-ray spectrum, and SEM image with diameter of partially aged SiO<sub>2</sub> particle (particle #37).

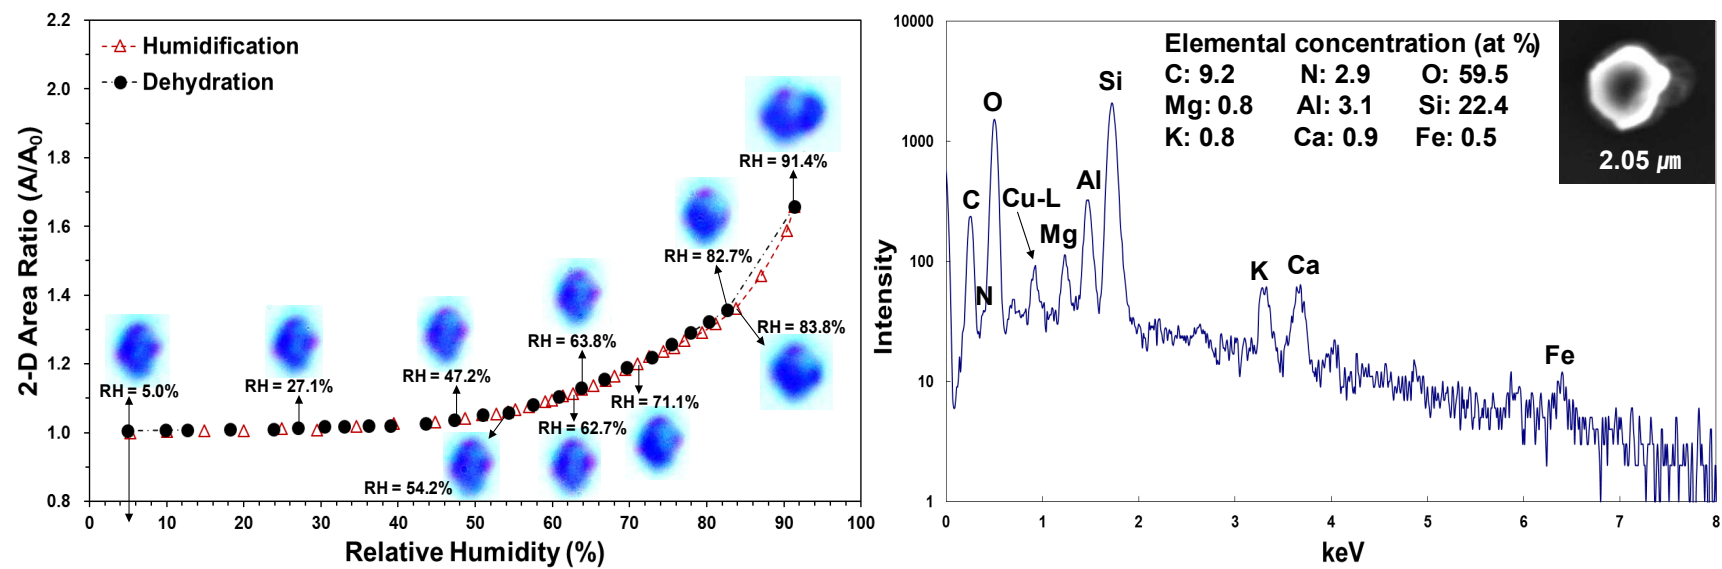

**Figure S10.** 2-D area ratio plot, X-ray spectrum, and SEM images with diameters of aluminosilicate particles (particles #29 and #32).

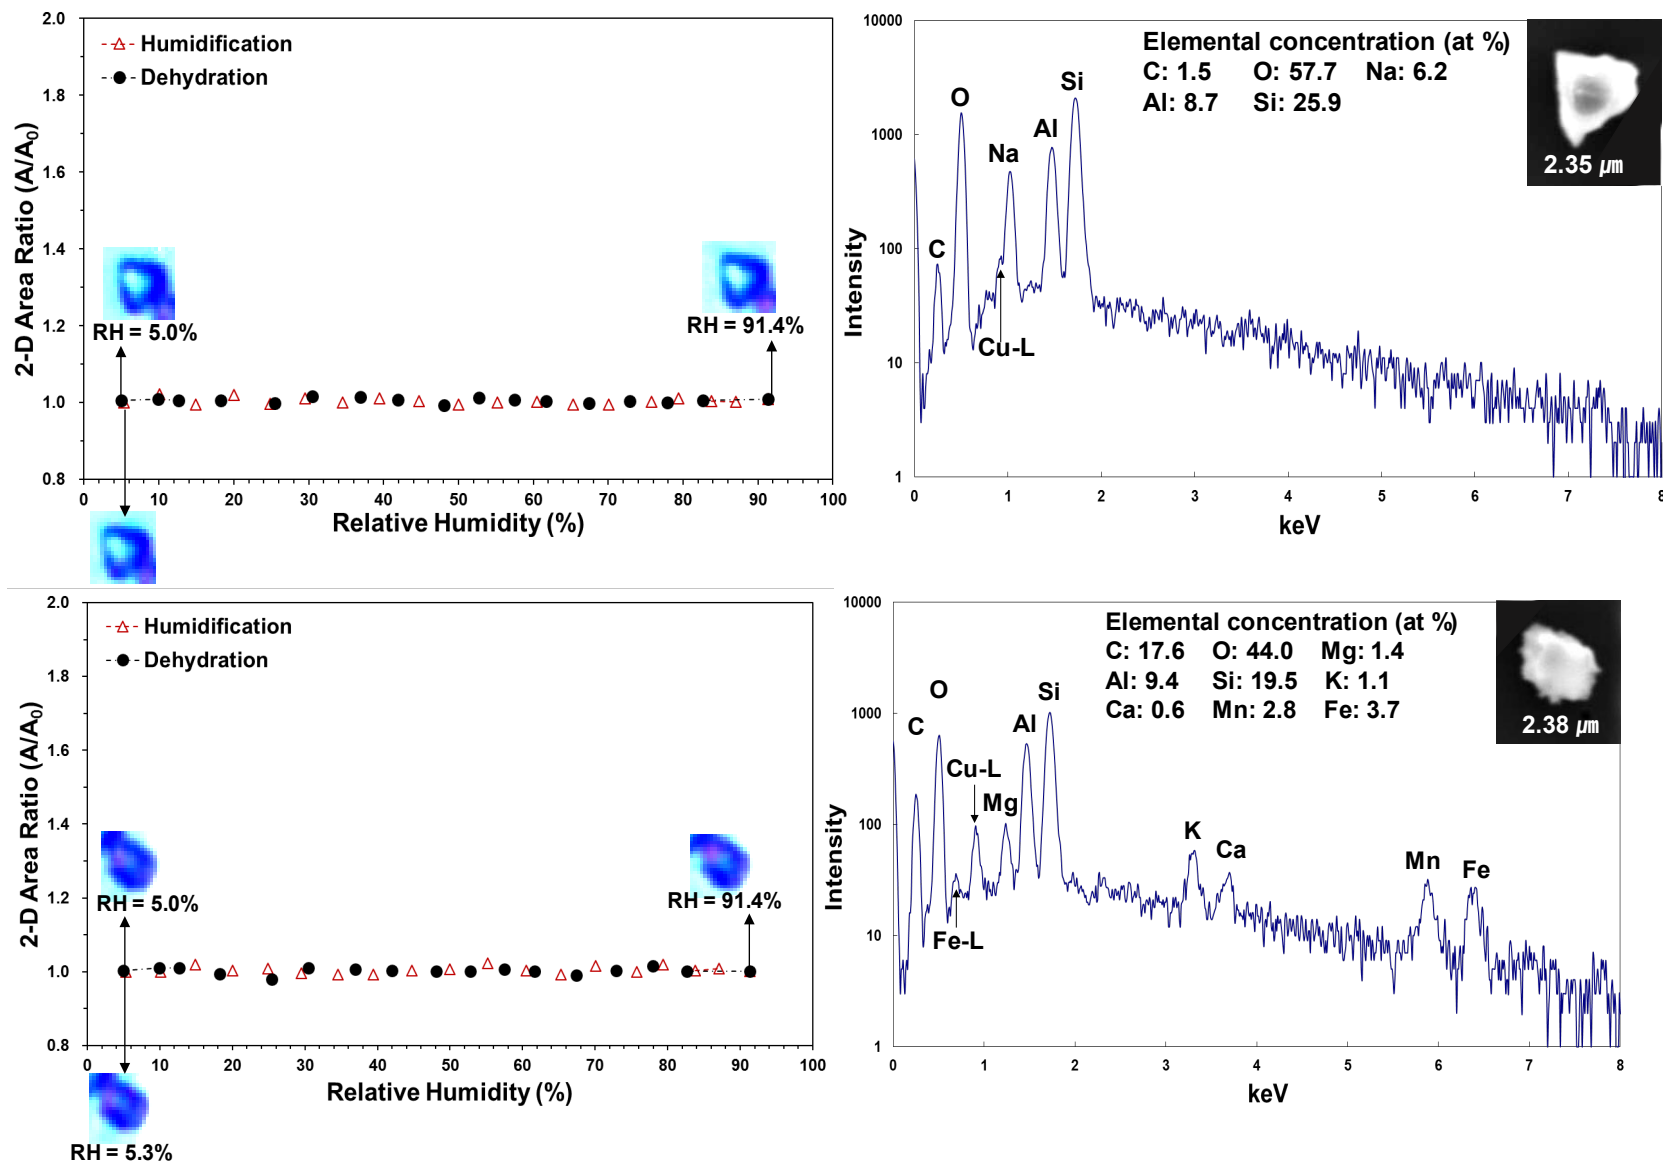

**Figure S11.** 2-D area ratio plot, X-ray spectrum, and SEM images with diameters of Fe-rich particles (particles #2 and #7).

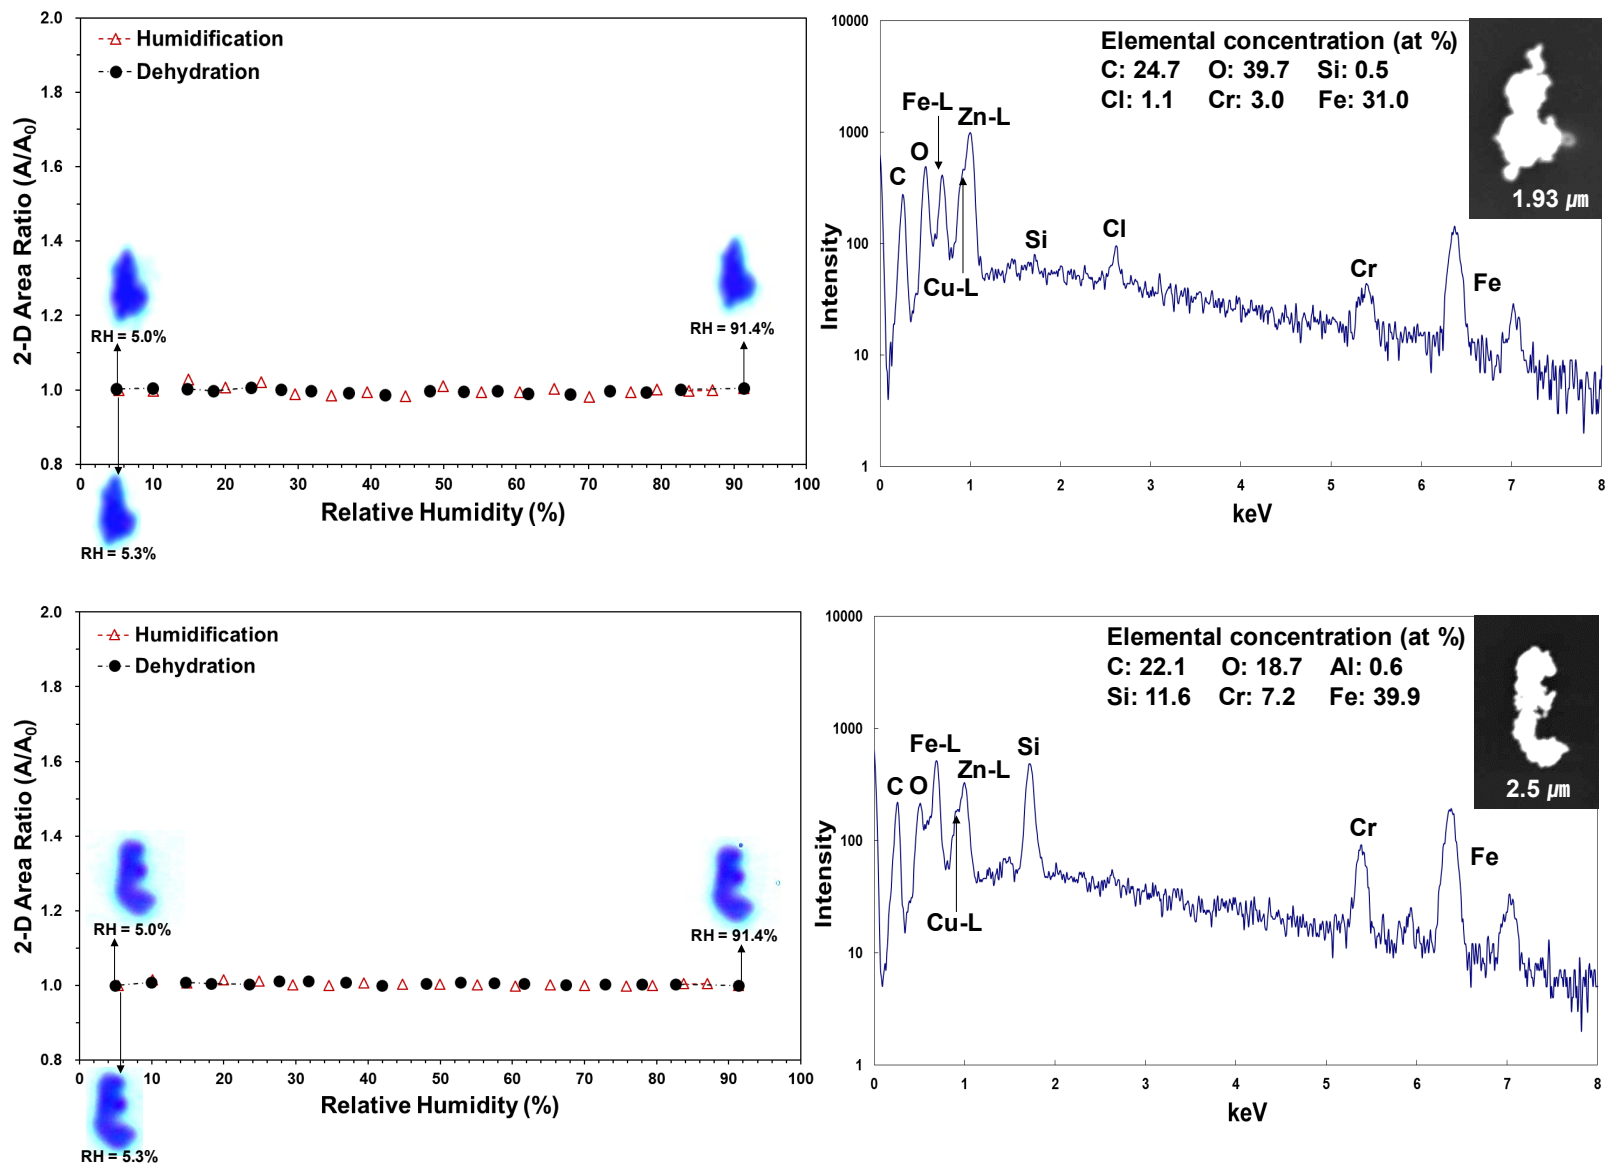

Supplement: Supplementary file 1 [file acp-23-12571-2023-supplement.pdf]
